# Supplementary material for: Enhanced energy storage performance in reaction-sintered AgNbO3 antiferroelectric ceramics
Source: Royal Society of Chemistry journal article supplement (doi:10.1039/d3dt00182b), 2023-01-01
Supplement: d3dt00182b1.pdf [file d3dt00182b1.pdf]

## Supplementary Material

### Enhanced Energy Storage Performance in Reaction-Sintered AgNbO<sub>3</sub> Antiferroelectric Ceramic

Parastoo Moradi<sup>a</sup>, Ehsan Taheri-Nassaj<sup>a, \*</sup>, Amin Yourdkhani<sup>a</sup>, Vasyl Mykhailovych<sup>b,c,d</sup>, Andrei Diaconu<sup>b</sup>, Aurelian Rotaru<sup>b</sup>

<sup>a</sup> Department of Materials Engineering, Tarbiat Modares University, Tehran, 14115-143, Iran

<sup>b</sup> Faculty of Electrical Engineering and Computer Science & MANSiD Research Center, Stefan cel Mare University, 13 Universitatii St., 720229, Suceava, Romania

<sup>c</sup> Department of General Chemistry and Chemistry of Materials, Yuriy Fedkovych Chernivtsi National University, 2, Kotsiubynskyi St., 58002 Chernivtsi, Ukraine

<sup>d</sup> Physical, Technical and Computer Science Institute, Yuriy Fedkovych Chernivtsi National University, 2, Kotsiubynskyi St., 58002, Chernivtsi, Ukraine

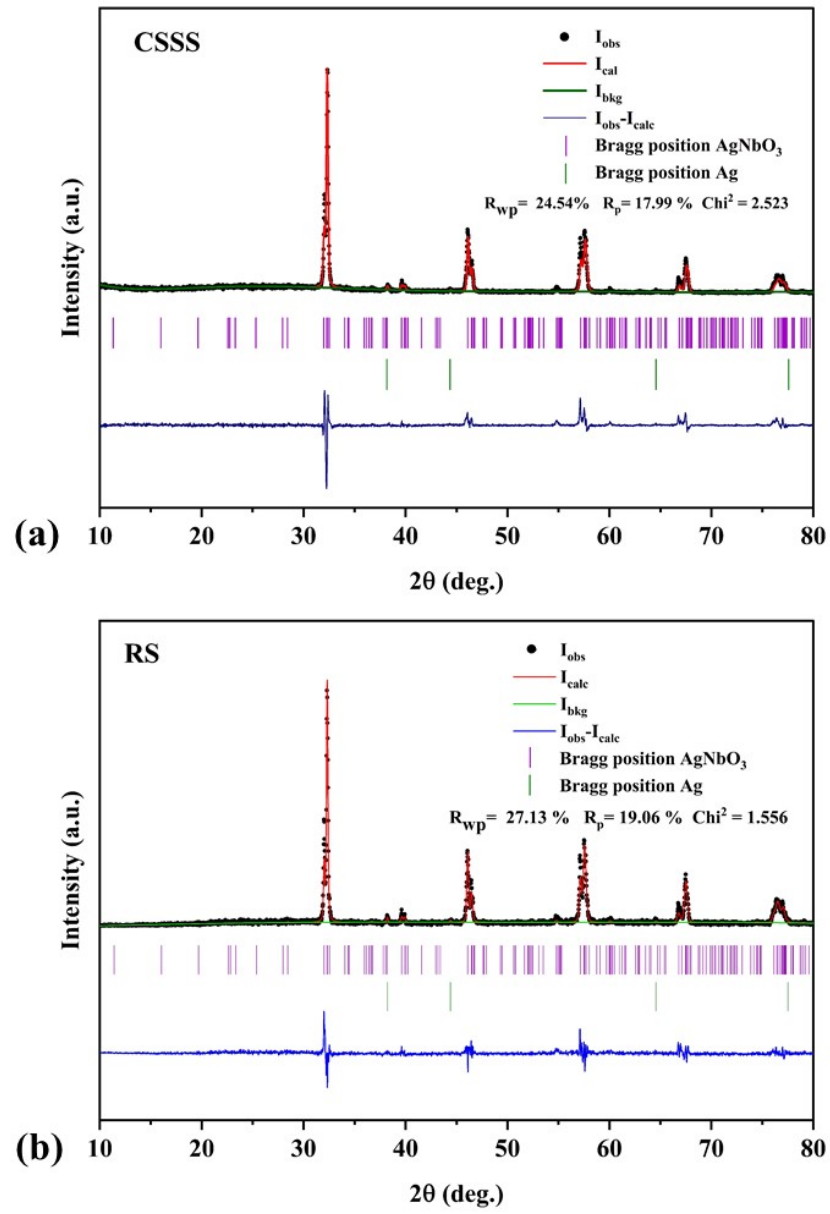

Figure S1. Rietveld Refinement patterns of CSSS and RS ceramics.

Table S1. Room-temperature atomic coordinates and isotropic displacement parameters of CSSS and RS ceramics with the Pbcm space group using Rietveld refinements.

| Sample | Atom | Site | x        | y        | z        | Uiso    |
|--------|------|------|----------|----------|----------|---------|
| CSSS   | Ag1  | 4d   | 0.749237 | 0.248225 | 0.750000 | 0.01855 |
|        | Ag2  | 4c   | 0.748537 | 0.250000 | 0.500000 | 0.01855 |
|        | Nb   | 8e   | 0.751108 | 0.746858 | 0.624110 | 0.01628 |
|        | O4   | 4d   | 0.697855 | 0.751579 | 0.750000 | 0.00614 |
|        | O5   | 4c   | 0.808355 | 0.750000 | 0.500000 | 0.00614 |
|        | O6   | 8e   | 0.465955 | 0.523079 | 0.613041 | 0.00614 |
|        | O7   | 8e   | 0.964255 | 0.459379 | 0.640741 | 0.00614 |
| RS     | Ag1  | 4d   | 0.753444 | 0.231446 | 0.750000 | 0.02574 |
|        | Ag2  | 4c   | 0.752744 | 0.250000 | 0.500000 | 0.02574 |
|        | Nb   | 8e   | 0.752193 | 0.736737 | 0.625672 | 0.02387 |
|        | O4   | 4d   | 0.709360 | 0.768571 | 0.750000 | 0.03675 |
|        | O5   | 4c   | 0.819860 | 0.750000 | 0.500000 | 0.03675 |
|        | O6   | 8e   | 0.477460 | 0.540071 | 0.621486 | 0.03675 |
|        | O7   | 8e   | 0.975760 | 0.476321 | 0.649186 | 0.03675 |

Table S2. Lorentzian isotropic crystallite size broadening (LX) resulting from Rietveld refinement for CSSS and RS ceramics

| Sample | LX    | Uncertainty of LX | Crystallite size (nm) |
|--------|-------|-------------------|-----------------------|
| CSSS   | 5.216 | 0.217             | 184.2                 |
| RS     | 4.312 | 0.094             | 152.3                 |

The equation used to calculate the crystallite size is as follows:

$$\text{Crystallite size} = (18000 \cdot K \cdot \lambda) / (\pi \cdot LX)$$

where K is the Scherrer constant (0.9) and  $\lambda = 1.5406 \text{ \AA}$ .

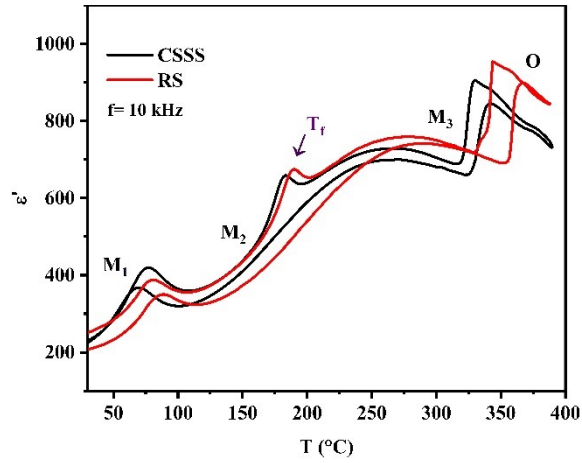

Figure S2. Temperature dependence of the real part of the dielectric permittivity ( $\epsilon'$ ) at 10 kHz in a heating and cooling cycle.

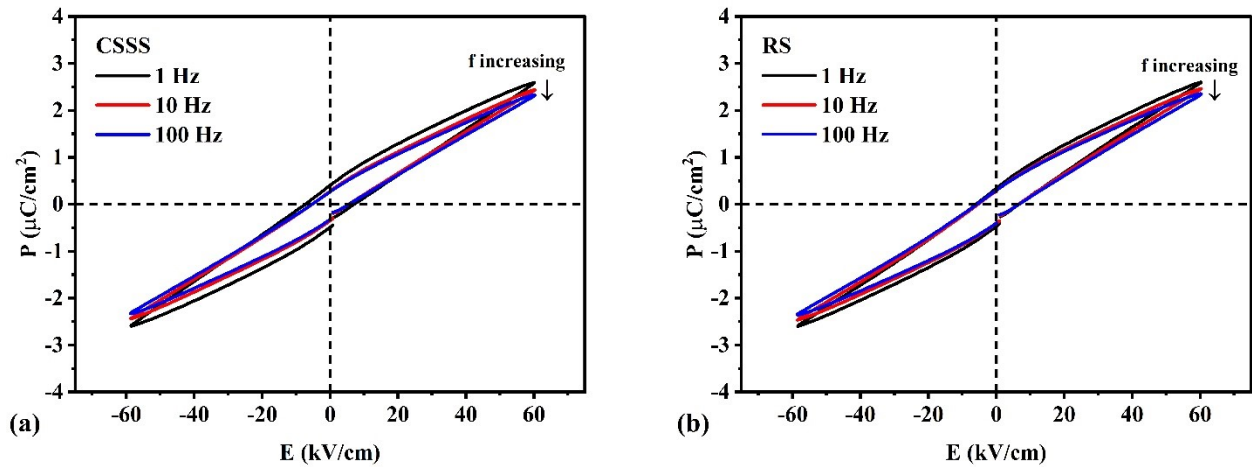

Figure S3. Frequency dependent polarization for CSSS and RS under an  $E = 60$  kV/cm at room temperature.
